# Supplementary material
Source: PubMed Central journal article supplement (PMC2347405)
Supplement: jbacter_190_9_3192__1.pdf [file jbacter_190_9_3192__1.pdf]

**Supplementary Material - Primer Sequences**

| <b>Targetgene</b> | <b>PCR / Sequencing</b> | <b>Name</b> | <b>Sequence</b>                                     |
|-------------------|-------------------------|-------------|-----------------------------------------------------|
| <i>ddl</i>        | PCR                     | GEDG_F      | ATC CAC GGG ACT TTC GG(AGCT) GA(AG) GA(CT) GG       |
| <i>ddl</i>        | PCR                     | FYDI_R      | GGG GTA CTT ATT GTT (AGT)AT (AG)TC (AG)TA (AG)AA    |
| <i>ddl</i>        | PCR                     | FYDY_R      | GGG GTA CTT ATT GTT (AG)TA (AG)TC (AG)TA (AG)AA     |
| <i>ddl</i>        | PCR                     | GKEL_R      | GAG GAC GCC GAC GGT (AGCT)AG (CT)TC (CT)TT (AGCT)CC |
| <i>ddl</i>        | PCR                     | EINT_R      | GGT CAT GCC GGG GAT (AGCT)GT (AG)TT (AGT)AT (CT)TC  |
| <i>ddl</i>        | PCR                     | NTIP_R      | GGC GGG AGT CAT GCC (AGCT)GG (AGT)AT (AGCT)GT GTT   |
| <i>ddl</i> Pdj    | PCR                     | Pdj_ddl_F   | AAA ATG CGG CAC CTC CAC CC                          |
| <i>ddl</i> Pdj    | PCR                     | Pdj_ddl_R0  | CGC AGC ATC ACG TCC ACA C                           |
| <i>ftsQ</i> Pdj   | PCR                     | Pdj_FtsQ_F1 | CTG GAC CGC ATC CGC CTC                             |
| <i>ftsQ</i> Pdj   | PCR                     | Pdj_FtsQ_R1 | CAT GAC ATC GCT GTA GTC TTC C                       |
| <i>ftsA</i> Pdj   | PCR                     | Pdj_FtsA_F1 | AAG AGG TGA AGG AGA TCG CCC                         |
| <i>ftsA</i> Pdj   | PCR                     | Pdj_FtsA_R2 | CGT CTT CAT ATT CGC AAC TGC C                       |
| <i>ftsZ</i> Pdj   | PCR                     | Pdj_FtsZ_F2 | CCA CGA TGC CCT TCA GCT TC                          |
| <i>ftsZ</i> Pdj   | PCR                     | Pdj_FtsZ_R0 | CCG AAG CCA AAG AGG CAG C                           |
| <i>ddl</i> Pva    | PCR                     | Pva_Dala_F1 | CGA AGA AGT TTG GCC ATG ACA C                       |
| <i>ddl</i> Pva    | PCR                     | Pv_ddl_R3   | TGT CCC GCA GCA TCA CAT CC                          |
| <i>ftsQ</i> Pva   | PCR                     | Pva_FtsQ_F1 | CGC ACG TGA TCG ATT ACG AGC C                       |
| <i>ftsQ</i> Pva   | PCR                     | Pva_FtsQ_R1 | CGT CGA GCG TGA GCT TGC C                           |
| <i>ftsA</i> Pva   | PCR                     | Pv_FtsA_F1  | ACC TGC GTA AAC GAC GCC C                           |
| <i>ftsA</i> Pva   | PCR                     | Pv_FtsA_R1  | CGT TCG GGA TTT GCA GAG CC                          |
| <i>ftsZ</i> Pva   | PCR                     | Pv_FtsZ_F2  | CCG GAC CAG ACA CAC ATC C                           |
| <i>ftsZ</i> Pva   | PCR                     | Pv_FtsZ_R1  | GCA TTG AGC TGG TTC AGC CC                          |
| 16S rDNA          | PCR                     | 616F        | AGA GTT TGA T(CT)(AC) TGG CTC AG                    |
| 23S rDNA          | PCR / Sequencing        | 989R        | C(AG)C TTA GAT GC(CT) TTC AGC G                     |
| 23S rDNA          | PCR / Sequencing        | epix40F     | (CT)AG CAG GCG ATG AAG GAC                          |
| 23S rDNA          | Sequencing              | 348R        | GAG CCG ACA TCG AGG                                 |
| 23S rDNA          | Sequencing              | 457R        | CTT TCC CTC (AG)CG GTA CT                           |
| 23S rDNA          | Sequencing              | 1037R       | GAC AAG GAA TTT CGC TAC                             |
| 23S rDNA          | Sequencing              | 940VII      | GAA (CG)TG AAA CAT CT(ACT) AGT                      |
| 23S rDNA          | Sequencing              | 457F        | AGT ACG G(CT)G AGG GAA AG                           |
| 23S rDNA          | Sequencing              | 1186F       | GGT AGG GGA GCG TTC                                 |
| 23S rDNA          | Sequencing              | 1602F       | CGC AAA CCG ACA CAG GT                              |
| 23S rDNA          | Sequencing              | 1923F       | TCC TAA GGT AGC GAA ATT CC                          |
| 23S rDNA          | Sequencing              | 2587F       | A(AG)A ACG TCG TGA GAC AG                           |
| 5S rDNA           | PCR                     | 554R        | AGC TTA ACT (GT)(CT)(CT) GTG TTC GG                 |
| 5S rDNA           | PCR                     | 502R        | CGA GTT CGG GAT GGG ATC                             |
