# Supplementary material
Source: PubMed Central journal article supplement (PMC2347405)
Supplement: jbacter_190_9_3192__2.pdf [file jbacter_190_9_3192__2.pdf]

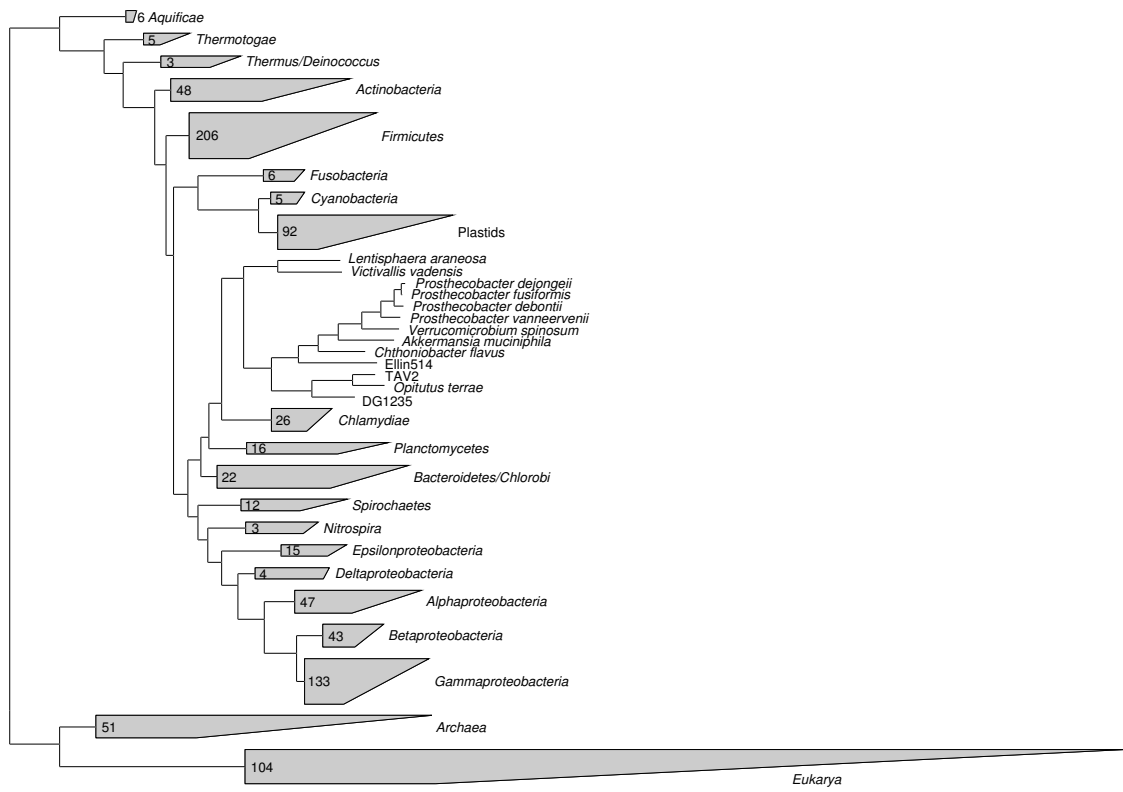

(A)

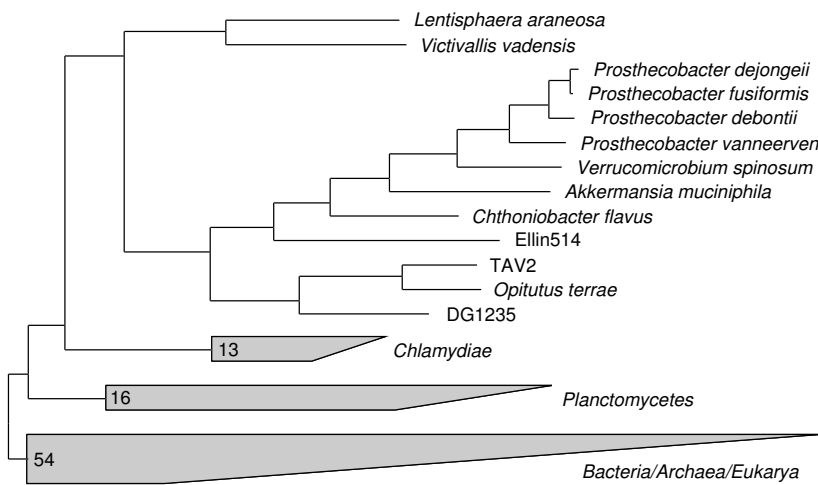

(B)

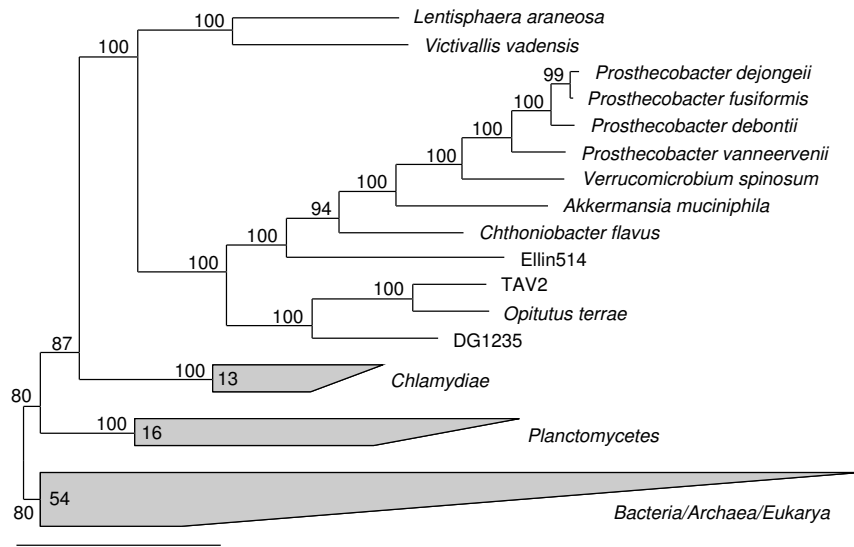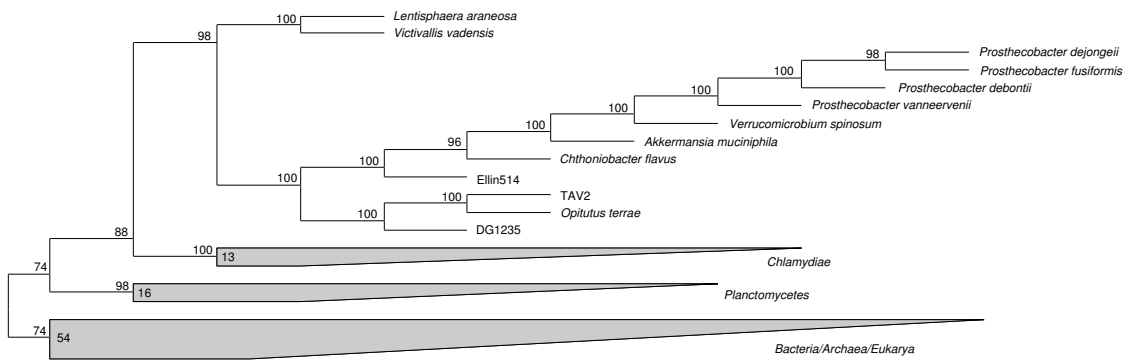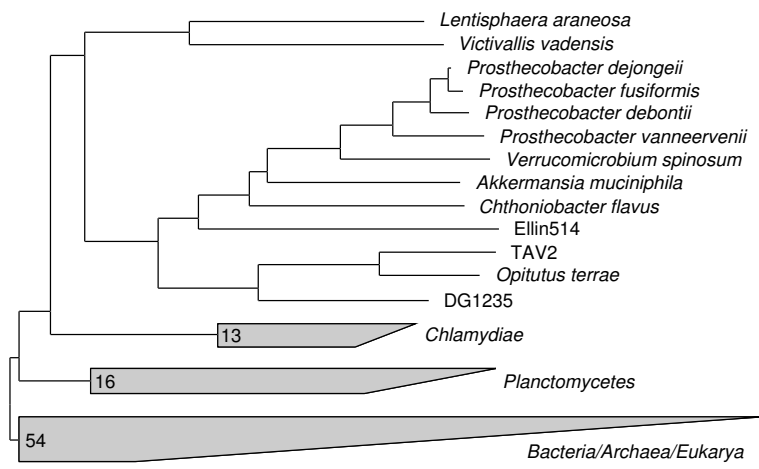

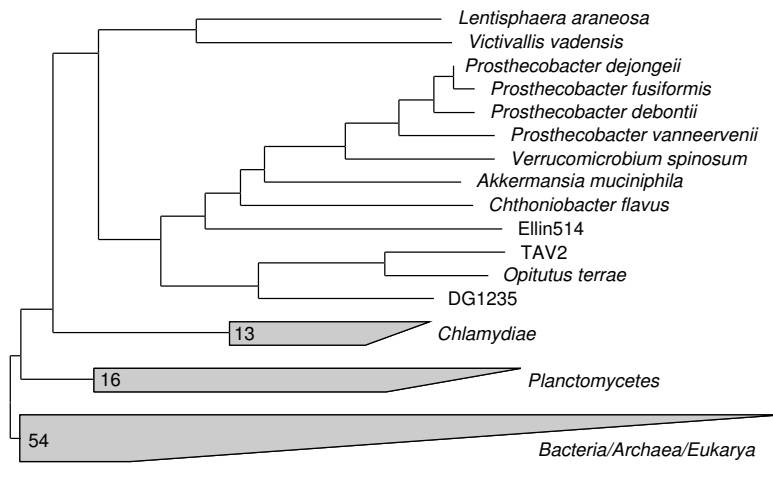

(F)

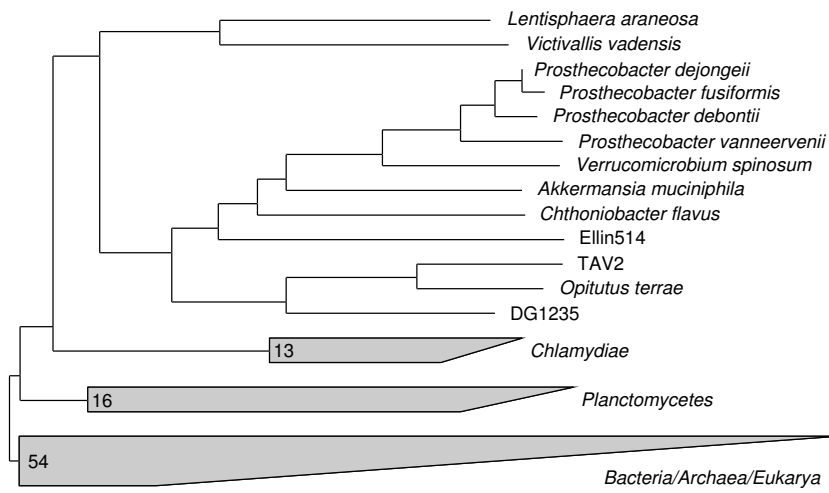

(G)

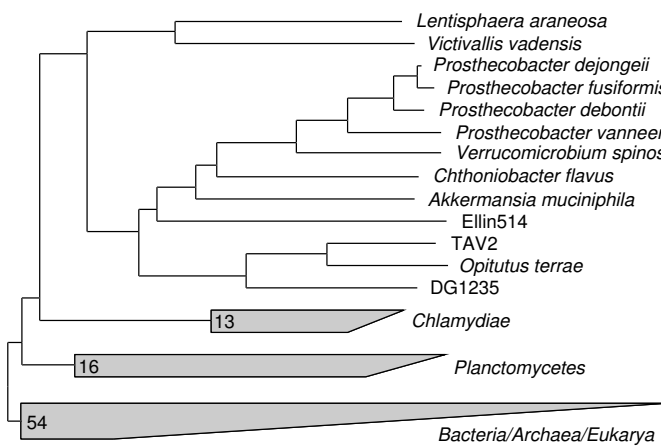

(H)

### **Supplementary Material – Representative selection of 23S rRNA trees.**

Phylogenetic 23S rRNA trees were produced using the treeing methods and minimum similarity filters listed below. Numbers in closed groups denote the number of included sequences. Numbers at nodes represent bootstrap values in percent. Bar represents 10% estimated evolutionary distance. Except for Panel A, the group of other *Bacteria / Archaea / Eukarya* was scaled down graphically.

- (A) RAxML; 50%; same tree as Figure 4A with group *Bacterial/Archaea/Eukarya* opened
- (B) AxML; 50%
- (C) PHYML; 50%; 1000 bootstraps
- (D) DNAPARS; 50%; 1000 bootstraps
- (E) FITCH; 50%
- (F) NEIGHBOR; 50%
- (G) NEIGHBOR; 20%
- (H) NEIGHBOR; 0%
